RESEARCH ARTICLE

# Caizhixuan hair tonic regulates both apoptosis and the PI3K/Akt pathway to treat androgenetic alopecia

Tingting Fang<sup>1</sup>, Ruofei Xu<sup>2</sup>, Shaopeng Sun<sup>1</sup>, Yineng He<sup>1</sup>, Yi Yan<sup>1</sup>, Hongyang Fu<sup>3</sup>, Hongbin Luo<sup>3</sup>, Yi Cao<sup>3</sup>, Maocan Tao<sup>3\*</sup>

**1** The First Clinical Medical College of Zhejiang Chinese Medical University, Hangzhou, Zhejiang, China, **2** Longyou County People's Hospital, Longyou, Zhejiang, China, **3** The First Affiliated Hospital of Zhejiang Chinese Medical University, Hangzhou, Zhejiang, China

\* [taomaocan@163.com](mailto:taomaocan@163.com)

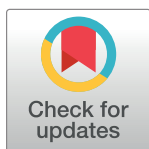

## Abstract

### Purpose

Caizhixuan hair tonic (CZX) is a topical traditional Chinese medicine (TCM) preparation for the treatment of androgenetic alopecia (AGA). However, its active compounds and underlying mechanism for treating AGA are still unclear. The purpose of this study was to observe the effects of CZX on hair growth promotion in AGA mice and to explore the active components and mechanism.

### Methods

Testosterone propionate was administered subcutaneously to mice to establish an AGA mouse model. The therapeutic effects of CZX on AGA were evaluated by observing skin colour changes, hair growth time, and average hair length; calculating the hair growth score; and performing skin histopathological analysis. Following that, CZX chemical components were analysed by ultra-high-performance liquid chromatography-quadrupole-time-of-flight mass spectrometry (UPLC–Q–TOF/MS). Network pharmacology was used to predict the major effects and possible mechanisms of CZX for the treatment of AGA. Furthermore, RT-qPCR and Western blotting were performed to assess the expression of key genes and proteins involved in PI3K/Akt and apoptosis pathways in order to validate CZX's predicted mechanism in AGA.

### Results

CZX promoted hair growth and improved the pathological morphology of hair follicles in the skin. In UPLC–Q–TOF/MS analysis, 69 components from CZX were isolated. Based on network pharmacology, CZX alleviated AGA by regulating PI3K/Akt and apoptosis pathways. According to RT-qPCR and Western blotting, CZX upregulated the expressions of PI3K, Akt, and Bcl-2, while downregulating that of Bax and caspase-3.

## OPEN ACCESS

**Citation:** Fang T, Xu R, Sun S, He Y, Yan Y, Fu H, et al. (2023) Caizhixuan hair tonic regulates both apoptosis and the PI3K/Akt pathway to treat androgenetic alopecia. PLoS ONE 18(2): e0282427. <https://doi.org/10.1371/journal.pone.0282427>

**Editor:** Chun-Hua Wang, Foshan University, CHINA

**Received:** November 29, 2022

**Accepted:** February 13, 2023

**Published:** February 24, 2023

**Copyright:** © 2023 Fang et al. This is an open access article distributed under the terms of the [Creative Commons Attribution License](https://creativecommons.org/licenses/by/4.0/), which permits unrestricted use, distribution, and reproduction in any medium, provided the original author and source are credited.

**Data Availability Statement:** All relevant data are within the paper and its [Supporting Information](#) files.

**Funding:** MC Tao got supported by the National Natural Science Foundation of China (No. 81774313) and the Traditional Chinese Medicine Specialist Inheritance Studio (No. GZS2020022). The funder Cao Yi participated in study design.

**Competing interests:** The authors have declared that no competing interests exist.

## Conclusions

CZX promotes hair growth to treat AGA by regulating the PI3K/Akt and apoptosis pathways.

## Introduction

Androgenetic alopecia (AGA) is the most common type of non-scar alopecia found in the clinic and is characterized by progressive hair follicle miniaturization and perifollicular micro-inflammation [1]. AGA occurs in 50% of adult women and 80% of adult men. Its incidence is increasing year by year and it is appearing in younger individuals [2]. Although AGA does not cause direct harm to the body, it may bring serious psychological pressure to patients, resulting in negative emotions such as inferiority, anxiety and depression and seriously affecting personal social activities and quality of life [3]. Therefore, treating hair loss is necessary to maintain the physical and mental health of patients. At present, the effective rates of finasteride and minoxidil, which have been approved by the Food and Drug Administration (FDA) for the treatment of AGA, are 48% and 35%, respectively [4]. However, wide application of these two drugs in the clinic is limited due to the side effects caused by long-term administration, such as sexual dysfunction, facial hairiness and scalp stimulation [5–7]. Therefore, it is crucial to actively seek new drugs that effectively promote hair growth.

In recent years, traditional Chinese medicine (TCM) has achieved good results with wide recognition for the treatment of AGA [8]. Caizhixuan hair tonic (CZX) is a topical preparation that is extracted from Chinese herbs with ethanol, and previous clinical practices have indicated that it has a therapeutic effect on AGA. CZX contains six Chinese herbs: *Polygonum multiflorum* Thunb. (Heshouwu), *Sesamum indicum* L. (Heizhima), *Astragalus membranaceus* (Fisch.) Bge. (Huangqi), *Platycladi cacumen* (Cebaiye), *Zingiber officinale* Rosc. (Shengjiang) and *Angelica sinensis* (Oliv.) Diels (Danggui). TCM is highly dependent on *P. multiflorum*, *A. sinensis* and *S. indicum* for the treatment of AGA [9,10]. Topical application of *P. multiflorum* significantly increased the hair follicle quantity and extended the hair follicle length in experimental animals [11]. *A. sinensis* can regenerate hair by inhibiting apoptosis in the regression period [12]. Zhang Y et al. found that volatile oil from *P. cacumen* could prolong the growth period of hair follicles in vitro, and its topical application could promote the growth of mouse hair in vivo [13]. Astragaloside IV, the active ingredient of *A. membranaceus*, inhibits apoptosis-regression catagen in hair follicles, leading to hair regrowth [14]. Clinical studies have shown that prescriptions containing herbs from Zingiberaceae have significant therapeutic effects on alopecia [15]. Nevertheless, the bioactive components and pharmacological mechanism of CZX are still unclear.

In this study, we used ultra-high-performance liquid chromatography-quadrupole-time-of-flight mass spectrometry (UPLC–Q–TOF/MS) to rapidly screen and systematically identify the chemical composition of CZX. The main components, pivotal targets and signalling pathways of CZX for the treatment of AGA were identified by network pharmacology and validated by in vivo experiments to thoroughly explain the relationship between CZX and AGA.

## Materials and methods

### Materials

CZX was supplied by Hangzhou Senkuo Biological Technology Co., Ltd. (WHBD273B, Hangzhou, China), and 2% minoxidil was supplied by Shanxi Zhendong Anxin Biopharmaceutical

Co., Ltd. (H20020190, Shanxi, China). Testosterone propionate injection was purchased from Ningbo Second Hormone Factory (210204, Ningbo, China). Soybean oil was purchased from Shanghai Aladdin Biochemical Technology Co., Ltd. (S110245, Shanghai, China). The rabbit polyclonal anti- $\beta$ -actin antibody was purchased from Dawen Biotechnology (DW130656, Hangzhou, China). Mouse monoclonal anti-Bcl-2 and anti-PI3K and rabbit monoclonal anti-Bax antibodies were purchased from Hangzhou HuaAn Biotechnology Co., Ltd. (EM1701-82, EM1701-62, ET1603-34, Hangzhou, China). Rabbit monoclonal anti-Akt and anti-caspase-3 antibodies were purchased from Cell Signaling Technology (4060S, 9662S, Danvers, MA, USA). The RNA Isolation Kit and cDNA Synthesis Kit were obtained from Wuhan Servicebio Technology Co., Ltd. (G3013, G3330, Wuhan, China).

### Preparation of the sample solution

CZX was diluted via mixing with 95% ethanol in a ratio of 1:4 (v/v) and then filtered through a 0.22  $\mu$ m filter membrane; afterwards, the filtrate was used for UPLC-Q-TOF/MS analysis.

### Animal experiments

Male C57BL/6 mice (6 weeks of age) were obtained from Hangzhou Medical College (Certificate No.: SCXK(ZHE)2019-0002). Experiments on animals were carried out according to the regulations of Zhejiang Chinese Medical University's Experimental Animal Ethics Committee (Approval No.: IACUC-20210322-05).

A week after adapting to feeding, mice were divided into four groups at random ( $n = 8$ ): the normal group, model group, CZX group and minoxidil group. A 2 cm  $\times$  3 cm dorsal hair section of these mice was depilated with depilatory cream. Beginning the next day, 20  $\mu$ L of 0.5% testosterone propionate injection (diluted with soybean oil) was injected subcutaneously into the shaved dorsum of each mouse once daily for 28 days, excluding the normal group. Half an hour after the application of testosterone, 100  $\mu$ L of the corresponding drug solution was applied topically to each group of mice separately as follows: the minoxidil group was given 2% minoxidil, the CZX group was given CZX hair tonic, and the normal and model groups were given 95% ethanol solution as controls.

Daily observations were made of the colour of the skin in the depilated area of each group, as well as when the colour changed from pink to black and when the hair began to grow. From the 8th day after topical administration, hair regrowth was scored every other day to be able to dynamically observe the rate of hair growth. We scored hair growth according to the percentage of hair growth in the depilated area: 0 to 20% was scored as 1, 20% to 40% as 2, 40% to 60% as 3, 60% to 80% as 4 and 80% to 100% as 5 [16]. After 28 days of treatment, the mice were euthanized by carbon dioxide asphyxiation, and the skin of the dorsal experimental area was obtained for further experiments. Five hairs were randomly extracted from the depilated area of each mouse, and their lengths were measured with a Vernier calliper.

### Histological analyses

The excised dorsal skin of each mouse was immersed in 4% paraformaldehyde. After conventional ethanol gradient dehydration, the skin samples were embedded in paraffin and sectioned into 4  $\mu$ m slices, including longitudinal and transverse patterns, and then stained with haematoxylin and eosin (HE). The longitudinal sections were used to observe the hair follicle morphology, while the transverse sections were used to count the hair follicles.

## UPLC-Q-TOF/MS analysis

Qualitative analysis of CZX was performed by UPLC (Waters, Milford, MA, USA). The chromatographic separation was performed on a Waters CORTECS UPLC T3 column (2.1 × 100 mm, 1.6 μm). The mobile phase was composed of 0.1% aqueous formic acid solution (A) and acetonitrile (B). The gradient elution conditions were as follows: 0 to 2 min, 5% B; 2 to 32 min, 5% to 100% B; 32 to 33 min, 100% B; 33.5 min, 5% B; 33.5 to 35 min, 5% B. The column temperature was set at 35°C, the flow rate was 0.3 mL/min, and the injection volume was 2 μL.

Electrospray ionization (ESI) sources were used to acquire mass spectrometry data from 50 m/z to 1200 m/z in both negative and positive ionization modes. The source parameters were as follows: ion source temperature of 120°C, desolvation temperature of 400 to 500°C, capillary voltage of 2.5 to 3.0 kV, sample cone voltage of 40 V, source offset voltage of 80 V, low collision energy of 6 V, high collision energy of 15 to 45 V, and desolvation gas flow rate of 800 to 1000 L/h.

## Network pharmacology analysis

**Target prediction of the identified components.** The compounds identified in CZX were subjected to network pharmacological analysis. Their 2D structures were obtained from the PubChem database (<https://pubchem.ncbi.nlm.nih.gov/>) and then imported into the SwissTargetPrediction database (<http://www.swisstargetprediction.ch/>) to predict the possible targets of the components with “*Homo sapiens*” selected as the species. Then, multiple targets were obtained for each chemical component to exert its pharmacological effects.

**Collection of potential targets for AGA.** The GeneCards (<https://www.genecards.org/>), OMIM (<https://omim.org/>), PharmGkb (<https://www.pharmgkb.org/>), and DrugBank (<https://go.drugbank.com/>) databases were used to search for genes related to AGA using the keyword “androgenetic alopecia”. The search results from the four databases were merged to remove duplicate targets to obtain the potential target genes for the treatment of AGA.

**Construction of the protein-protein interaction (PPI) network.** R language was used to obtain the intersection targets of the effective components of CZX and the potential targets of AGA and to draw a Wayne diagram. Based on the above analyses, the visual Component-target network was constructed using Cytoscape software. The intersection target genes were imported into the STRING database (<https://cn.string-db.org/>) to determine the relationship between the targets and obtain PPI network data with the species set as “*Homo sapiens*” and a minimum required interaction score of 0.4. Then, the obtained network was imported into Cytoscape 3.8.0, and the CytoNCA plug-in was used to calculate the score of each node. To identify core genes, betweenness centrality (BC), closeness centrality (CC), degree centrality (DC), eigenvector centrality (EC), local average connectivity-based method (LAC) and network centrality (NC) greater than the median were utilized as the screening criteria [17].

**Gene Ontology (GO) and Kyoto Encyclopedia of Genes and Genomes (KEGG) pathway enrichment analyses.** R language was used for GO and KEGG pathway enrichment analysis of intersection targets, and  $P < 0.05$  was used as the screening condition. GO enrichment analysis included biological process (BP), cellular component (CC) and molecular function (MF).

**Molecular docking.** The PDB file of the core targets was downloaded from the RSCB PDB online platform (<https://www.rcsb.org/>), and the MOL2 file of the core active ingredients was downloaded from the PubChem database (<https://pubchem.ncbi.nlm.nih.gov/>). Molecular docking was performed with AutoDock Tools software (1.5.6, The Scripps Research Institute, La Jolla, CA, USA), and the minimum binding energy was recorded. The results were processed using PyMOL software (2.5.0, Schrodinger, Inc., New York, USA) and displayed in images.

Table 1. Primer sequences used for PCR.

| Gene      | Upstream primer sequence (5' to 3') | Downstream primer sequence (5' to 3') |
|-----------|-------------------------------------|---------------------------------------|
| PI3K      | AAACTCCGAGACACTGCTGATG              | GCTGGTATTTGGACACTGGGTAG               |
| Akt       | CTTCCTCCTCAAGAACGATGGC              | TGTCTTCATCAGCTGGCATTGT                |
| Bcl-2     | AGGATTGTGGCCTTCTTTGAGT              | ACAGCCAGGAGAAATCAAACAGA               |
| Bax       | TTGCTACAGGGTTTCATCCAGG              | GCAAAGTAGAAGAGGGCAACCA                |
| Caspase-3 | TGGAATGTCATCTCGCTCTGGT              | GAAGAGTTTCGGCTTTCCAGTC                |
| GAPDH     | CCTCGTCCCGTAGACAAAATG               | TGAGGTCAATGAAGGGGTCGT                 |

<https://doi.org/10.1371/journal.pone.0282427.t001>

## Western blot analysis

Total protein was extracted from the mouse skins, quantified by BCA protein assay and separated using SDS-PAGE. Following separation, the proteins were transferred onto PVDF membranes and blocked with 5% skim milk for 1 h. Then, a primary antibody was infused onto the membranes overnight at 4°C. After 18 h, the secondary antibodies were added for 1 h of incubation followed by chemiluminescence visualization. Quantified protein levels were analysed using ImageJ software, and the relative expression of target protein was calculated by comparing the greyscale value of the target band with the  $\beta$ -actin band from the same sample.

## Quantitative real-time PCR analysis

Total RNA was extracted from skin according to the TRIzol method, and the concentrations and purities of the RNAs were measured using a Nanodrop 2000. cDNA was synthesized according to the instructions of the reverse transcription reaction kit. Real-time PCR was executed as described below: pre-denaturation at 95°C for 10 min, denaturation at 95°C for 15 s, annealing at 60°C for 30 s, and extension at 60°C for 30 s for a total of 40 cycles. The relative mRNA levels were assessed by the  $2^{-\Delta\Delta C_t}$  method with GAPDH as the reference. PCR primer sequences were synthesized by Wuhan Servicebio Technology Co., Ltd. and are shown in Table 1.

## Statistical analysis

The statistical analysis was performed using GraphPad Prism 8.0.1. The data are expressed as the means  $\pm$  SDs. In situations where the data conformed to a normal distribution, Student's *t* test was used to compare differences between two groups, and one-way ANOVA was used for comparing differences between multiple groups. A *P* value less than 0.05 ( $P < 0.05$ ) was considered statistically significant.

## Results

### CZX-mediated promotion of hair growth

After the dorsal hair of seven-week-old C57BL/6 mice was depilated, the skin of the mice in the telogen phase at this time was pink in colour. The skin turned black when it entered the anagen phase, and finally, the hair grew back (Fig 1A). As shown in Fig 1D and 1E, skin darkening and hair regrowth took significantly longer in the model group than in the normal group, suggesting that testosterone administration may delay hair regrowth. Moreover, the application of CZX significantly reduced the time required for the dorsal skin to darken and hair to regrow compared with the model group ( $P < 0.05$ ,  $P < 0.001$ ).

To further test the hair growth-promoting activity of CZX, hair growth was scored every other day from the 8th day after drug administration. It was found that the score of the CZX



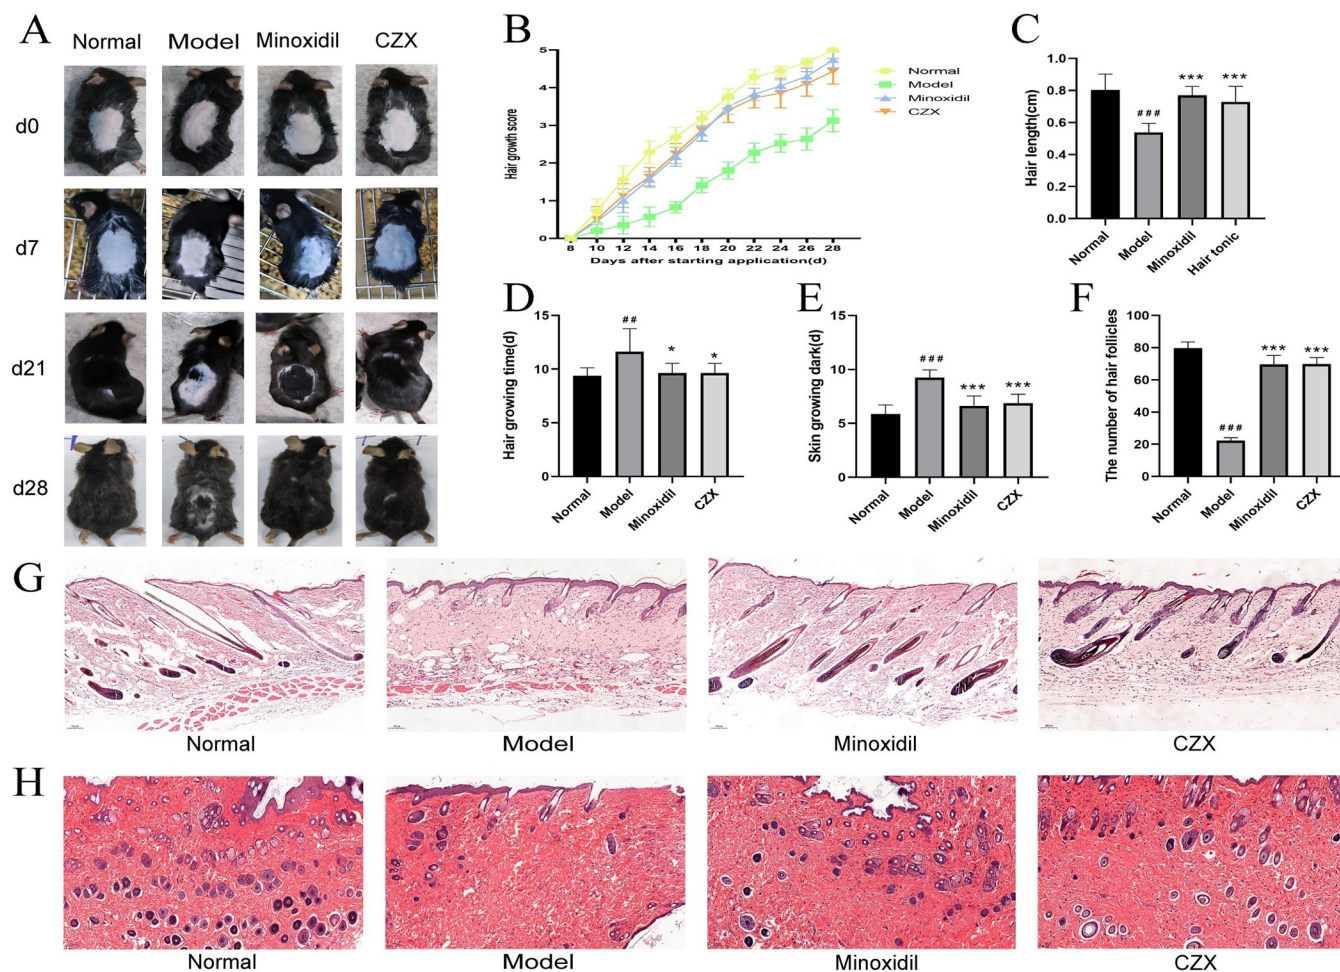

**Fig 1. Effect of CZX on the hair cycle and hair follicle morphology in mice.** (A) The backs of the mice were shaved and then treated with 95% ethanol, minoxidil and CZX. (B) Hair regrowth scores were determined every other day starting on the 8th day after treatment. (C) Average hair length of the mice in each group. (D) and (E) Skin regrowth times and skin darkening times. (F) The number of hair follicles. (G) and (H) Longitudinal and transverse sections of the dorsal skin. Digital images were captured using a 50 $\times$  magnification light microscope. The results are presented as the mean  $\pm$  SD. Compared with the normal group, ##  $P < 0.01$ , ###  $P < 0.001$ ; compared with the model group, \*  $P < 0.05$ , \*\*\*  $P < 0.001$ ,  $n = 8$ .

<https://doi.org/10.1371/journal.pone.0282427.g001>

group was higher than that of the model group (Fig 1B). After the experiment, the average hair length of the mice was longer in the CZX group than in the model group ( $P < 0.001$ ) (Fig 1C). The above results revealed that CZX showed significant hair growth promoting activity in an AGA mouse model.

### Effects of CZX on the histopathology of skin sections

The hair follicle morphology in the longitudinal dorsal skin sections is shown in Fig 1G. Mice in the normal, CZX and minoxidil groups had more hair follicles, mainly in the late anagen and early catagen stages, with significant melanin formation and downward growth into the deep dermis and subcutaneous tissues. The hair follicles of the model mice were sparse and mainly in the middle and late stages of catagen, with less melanin, located in the epidermis and superficial dermis. Hair follicles were counted using transverse sections (Fig 1H). The mean number of hair follicles in the model group was significantly lower than those in the normal, minoxidil and CZX groups ( $P < 0.001$ ) (Fig 1F).

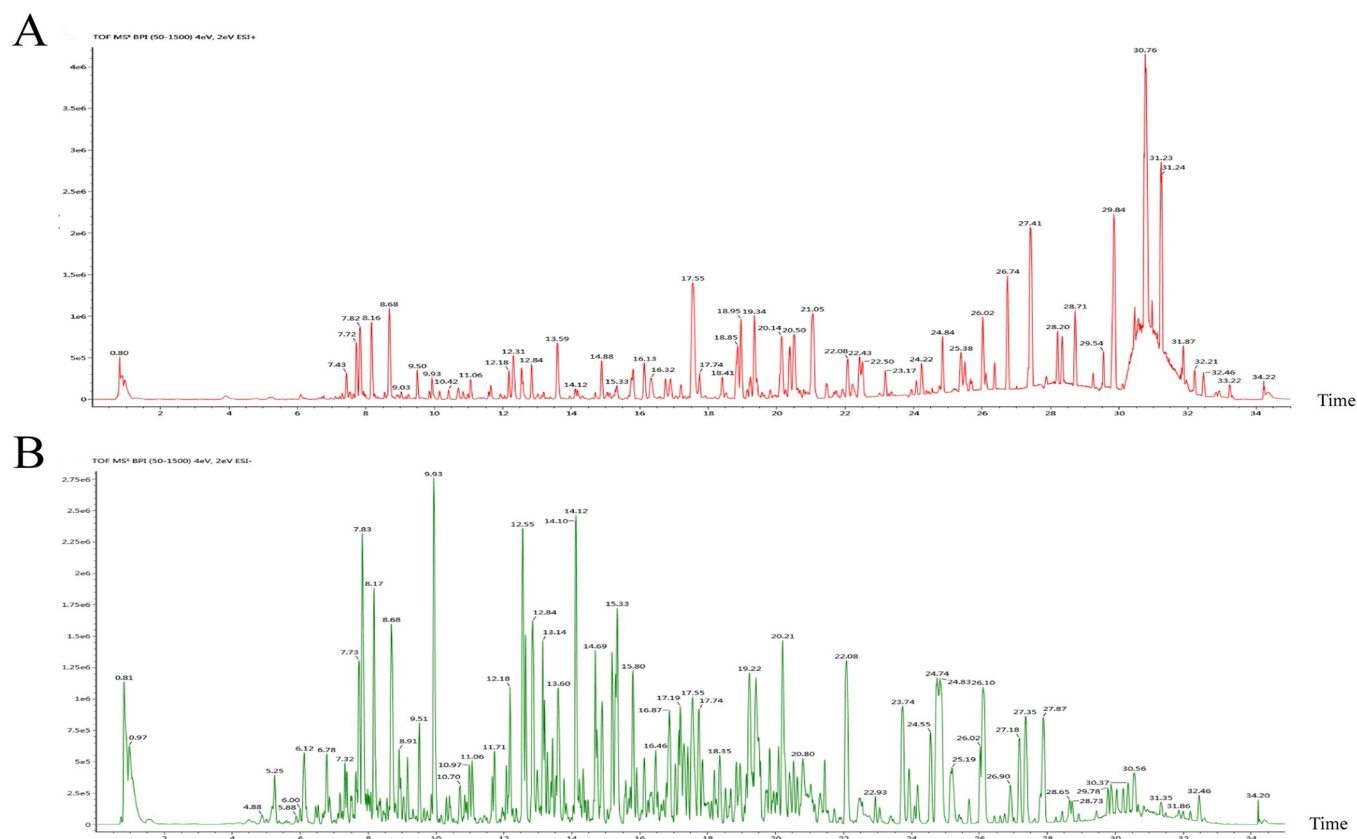

**Fig 2.** UPLC-Q-TOF/MS analysis of CZX. Total ion current base peak intensity (BPI) chromatogram in (A) positive mode and (B) negative mode.

<https://doi.org/10.1371/journal.pone.0282427.g002>

## Components of CZX

Following UPLC-Q-TOF/MS analysis (Fig 2A and 2B), 69 chemical constituents were analysed with a self-built database and by literature comparison, and 35 active components were screened according to Lipinski's rule of five [18] (Table 2), including 9 from Heshouwu, 12 from Huangqi, 10 from Danggui, 1 from Heizhima, 5 from Shengjiang, and 5 from Cebaiye. Among these, there were 3 common components between Danggui and Shengjiang; 1 common component between Danggui and Huangqi; 1 common component between Cebaiye and Huangqi; and 1 common component among Heshouwu, Cebaiye and Huangqi.

## Key compounds from CZX and targets for treating AGA

The identified compounds from CZX were analysed by network pharmacology to predict the possible mechanisms of CZX to treat AGA. We identified 490 compound targets in total through the SwissTargetPrediction database based on the identified compounds of CZX (Table 2) and retrieved 1118 AGA-related targets from the GeneCards, OMIM, PharmGkb, and DrugBank databases. Finally, 74 intersection targets for CZX and AGA were obtained (Fig 3A).

Thirty-five active components and 74 intersection targets were imported into Cytoscape 3.8.0 software to construct the Component-target network, which consisted of 109 nodes and 459 edges (Fig 3B). The top 10 components of the degree value were resveratrol, quercetin, emodin, 4-hydroxybenzaldehyde, 4-ethylresorcinol, 2',4'-dihydroxyacetophenone, tricin, Hyflavin, 3-O-methylquercetin and isoeugenol. It was speculated that these compounds may be the key components of CZX for the treatment of AGA.

Table 2. Identification of the chemical constituents of CZX.

| No. | Compound                                | Molecular formula                                             | RT (min) | Measured Mass(m/z) | Error(mDa) | Adduct ions | Medicinal materials of possible origin |
|-----|-----------------------------------------|---------------------------------------------------------------|----------|--------------------|------------|-------------|----------------------------------------|
| 1   | 3-Hydroxy-9,10-dimethoxyptercarpan      | C <sub>17</sub> H <sub>16</sub> O <sub>5</sub>                | 6.78     | 301.1078           | 0.7        | +H          | Huangqi                                |
| 2   | (+)-delta-Cadinene                      | C <sub>15</sub> H <sub>24</sub>                               | 25.19    | 205.1952           | 0.2        | +H, +Na     | Shengjiang                             |
| 3   | Physcion                                | C <sub>16</sub> H <sub>12</sub> O <sub>5</sub>                | 12.21    | 285.0755           | -0.2       | +H          | Heshouwu                               |
| 4   | Resveratrol                             | C <sub>14</sub> H <sub>12</sub> O <sub>3</sub>                | 10.85    | 229.0863           | 0.3        | +H          | Heshouwu                               |
| 5   | (E)-5-(4-Methoxystyryl)benzene-1,3-diol | C <sub>15</sub> H <sub>14</sub> O <sub>3</sub>                | 16.56    | 243.1014           | -0.2       | +H          | Heshouwu                               |
| 6   | cis-3-Hexenyl benzoate                  | C <sub>13</sub> H <sub>16</sub> O <sub>2</sub>                | 21.05    | 205.1226           | 0.3        | +H          | Cebaiye                                |
| 7   | 4-Ethylresorcinol                       | C <sub>8</sub> H <sub>10</sub> O <sub>2</sub>                 | 21.05    | 139.0754           | 0.1        | +H          | Danggui                                |
| 8   | 3'-Hydroxy-8-O-methylretusin            | C <sub>17</sub> H <sub>14</sub> O <sub>6</sub>                | 15.64    | 315.0864           | 0.1        | +H          | Huangqi                                |
| 9   | Ligustilide                             | C <sub>12</sub> H <sub>14</sub> O <sub>2</sub>                | 22.07    | 191.1069           | 0.2        | +H, +Na     | Danggui                                |
| 10  | Emodin                                  | C <sub>15</sub> H <sub>10</sub> O <sub>5</sub>                | 8.81     | 271.0604           | 0.3        | +H          | Heshouwu                               |
| 11  | 4-Hydroxybenzaldehyde                   | C <sub>7</sub> H <sub>6</sub> O <sub>2</sub>                  | 5.17     | 123.044            | -0.1       | +H          | Shengjiang                             |
| 12  | Moupinamide                             | C <sub>18</sub> H <sub>19</sub> NO <sub>4</sub>               | 10.15    | 314.1387           | 0          | +H          | Heshouwu                               |
| 13  | Hyflavin                                | C <sub>17</sub> H <sub>20</sub> N <sub>4</sub> O <sub>6</sub> | 6.28     | 377.1462           | 0.6        | +H          | Huangqi                                |
| 14  | Quercetin                               | C <sub>15</sub> H <sub>10</sub> O <sub>7</sub>                | 8.69     | 303.0505           | 0.5        | +H          | Heshouwu Cebaiye Huangqi               |
| 15  | 3-O-Methylquercetin                     | C <sub>16</sub> H <sub>12</sub> O <sub>7</sub>                | 8.78     | 317.066            | 0.4        | +H          | Huangqi                                |
| 16  | Isoferulic acid                         | C <sub>10</sub> H <sub>10</sub> O <sub>4</sub>                | 30.05    | 195.0654           | 0.3        | +H          | Huangqi Danggui                        |
| 17  | Phthalic anhydride                      | C <sub>8</sub> H <sub>4</sub> O <sub>3</sub>                  | 32.36    | 149.0232           | -0.1       | +H          | Danggui                                |
| 18  | Calycosin                               | C <sub>16</sub> H <sub>12</sub> O <sub>5</sub>                | 15.12    | 285.0758           | 0          | +H          | Huangqi                                |
| 19  | Tricin                                  | C <sub>17</sub> H <sub>14</sub> O <sub>7</sub>                | 12.23    | 331.081            | -0.2       | +H          | Heshouwu                               |
| 20  | Fallacinol                              | C <sub>16</sub> H <sub>12</sub> O <sub>6</sub>                | 12.27    | 301.0704           | -0.2       | +H          | Heshouwu                               |
| 21  | Kaempferol                              | C <sub>15</sub> H <sub>10</sub> O <sub>6</sub>                | 9.5      | 287.0551           | 0.1        | +H          | Huangqi Cebaiye                        |
| 22  | Sedanolid                               | C <sub>12</sub> H <sub>18</sub> O <sub>2</sub>                | 17.42    | 195.1377           | -0.2       | +H, +Na     | Danggui                                |
| 23  | Caryophyllene oxide                     | C <sub>15</sub> H <sub>24</sub> O                             | 21.5     | 221.1897           | -0.3       | +H          | Cebaiye                                |
| 24  | Betaine                                 | C <sub>5</sub> H <sub>11</sub> NO <sub>2</sub>                | 0.94     | 118.0863           | 0          | +H          | Huangqi                                |
| 25  | Adenine                                 | C <sub>5</sub> H <sub>5</sub> N <sub>5</sub>                  | 0.92     | 136.0622           | 0.4        | +H          | Shengjiang Danggui                     |
| 26  | Coumarin                                | C <sub>9</sub> H <sub>6</sub> O <sub>2</sub>                  | 22.93    | 147.0441           | 0          | +H          | Huangqi                                |
| 27  | Isoeugenol                              | C <sub>10</sub> H <sub>12</sub> O <sub>2</sub>                | 29.78    | 165.0909           | -0.1       | +H          | Shengjiang Danggui                     |
| 28  | Isopimaric acid                         | C <sub>20</sub> H <sub>30</sub> O <sub>2</sub>                | 24.84    | 303.2315           | -0.4       | +H, +Na     | Cebaiye                                |
| 29  | Isorhamnetin                            | C <sub>16</sub> H <sub>12</sub> O <sub>7</sub>                | 9.65     | 317.066            | 0.4        | +H          | Huangqi                                |
| 30  | Guaiacol                                | C <sub>7</sub> H <sub>8</sub> O <sub>2</sub>                  | 12.31    | 125.0596           | -0.1       | +H          | Danggui                                |
| 31  | Sesamol                                 | C <sub>7</sub> H <sub>6</sub> O <sub>3</sub>                  | 5.17     | 139.0391           | 0.1        | +H          | Heizhima                               |
| 32  | 2',4'-Dihydroxyacetophenone             | C <sub>8</sub> H <sub>8</sub> O <sub>3</sub>                  | 9.74     | 197.0456           | 0.1        | +HCOO       | Danggui                                |
| 33  | Formononetin                            | C <sub>16</sub> H <sub>12</sub> O <sub>4</sub>                | 15.64    | 313.0718           | 0          | +HCOO       | Huangqi                                |
| 34  | 3-Methyl-1,8,9-anthracenetriol          | C <sub>15</sub> H <sub>12</sub> O <sub>3</sub>                | 17.29    | 285.0776           | 0.7        | +HCOO       | Heshouwu                               |
| 35  | Vanillin                                | C <sub>8</sub> H <sub>8</sub> O <sub>3</sub>                  | 8.93     | 197.0458           | 0.2        | +HCOO       | Shengjiang Danggui                     |

<https://doi.org/10.1371/journal.pone.0282427.t002>

Seventy-four intersection targets were uploaded to the STRING database (<https://cn.string-db.org/>) for PPI analysis. There were 74 nodes and 359 edges, of which 4 targets did not participate in protein interactions (Fig 3C). Cytoscape 3.8.0 software and the CytoNCA plug-in were used to analyse the topology of the intersection genes. The core genes screened were JUN, CYP1A1, CYP19A1, Akt1, CYP3A4, ESR1, AR, and GAPDH (Fig 3D). We speculated that these targets may be the key targets of CZX in AGA treatment.

### Prediction of CZX's key effects on AGA

GO and KEGG enrichment analyses were conducted on 74 intersection targets. GO analysis consists of three aspects: BP, MF and cellular component (CC) (Fig 3E). According to the GO



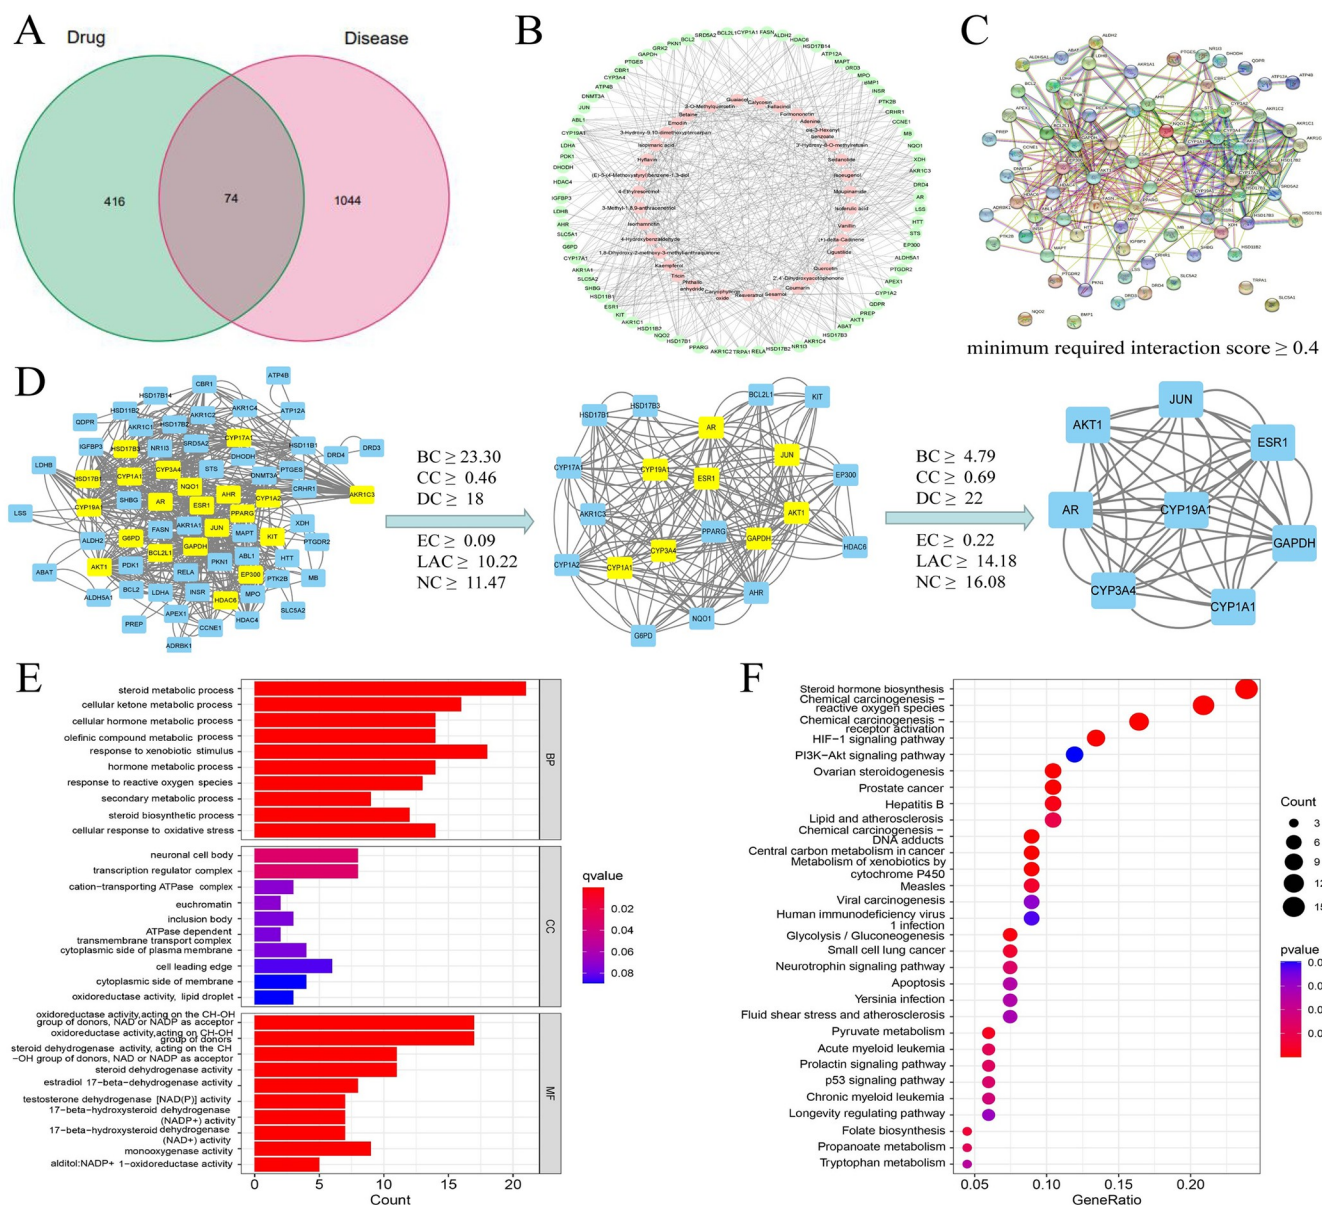

**Fig 3. Network pharmacology predicted the key targets and potential signalling pathways of CZX for the treatment of AGA.** (A) Venn diagram of the intersection targets between CZX and AGA. (B) Component-target network. (C) and (D) PPI analysis of the intersection targets. (E) GO enrichment analysis. (F) KEGG enrichment analysis.

<https://doi.org/10.1371/journal.pone.0282427.g003>

results, the mechanisms by which CZX can treat AGA were related to steroid metabolic process, cellular hormone metabolic process, transcription regulator complex, oxidoreductase activity and steroid dehydrogenase activity. The top 30 pathways enriched by KEGG are visually represented in a bubble plot (Fig 3F). The KEGG enrichment results indicated that the important pathways of CZX involved in the treatment of AGA included steroid hormone biosynthesis, the hypoxia-inducible factor-1 (HIF-1) signalling pathway, the phosphatidylinositol-3-kinase/protein kinase B (PI3K/Akt) signalling pathway, apoptosis, etc. Upon consultation of the relevant literature combined with enrichment analysis, we speculated that apoptosis and the PI3K/Akt signalling pathway may be important pathways by which CZX can treat AGA and verified this speculation through molecular experiments [19,20].

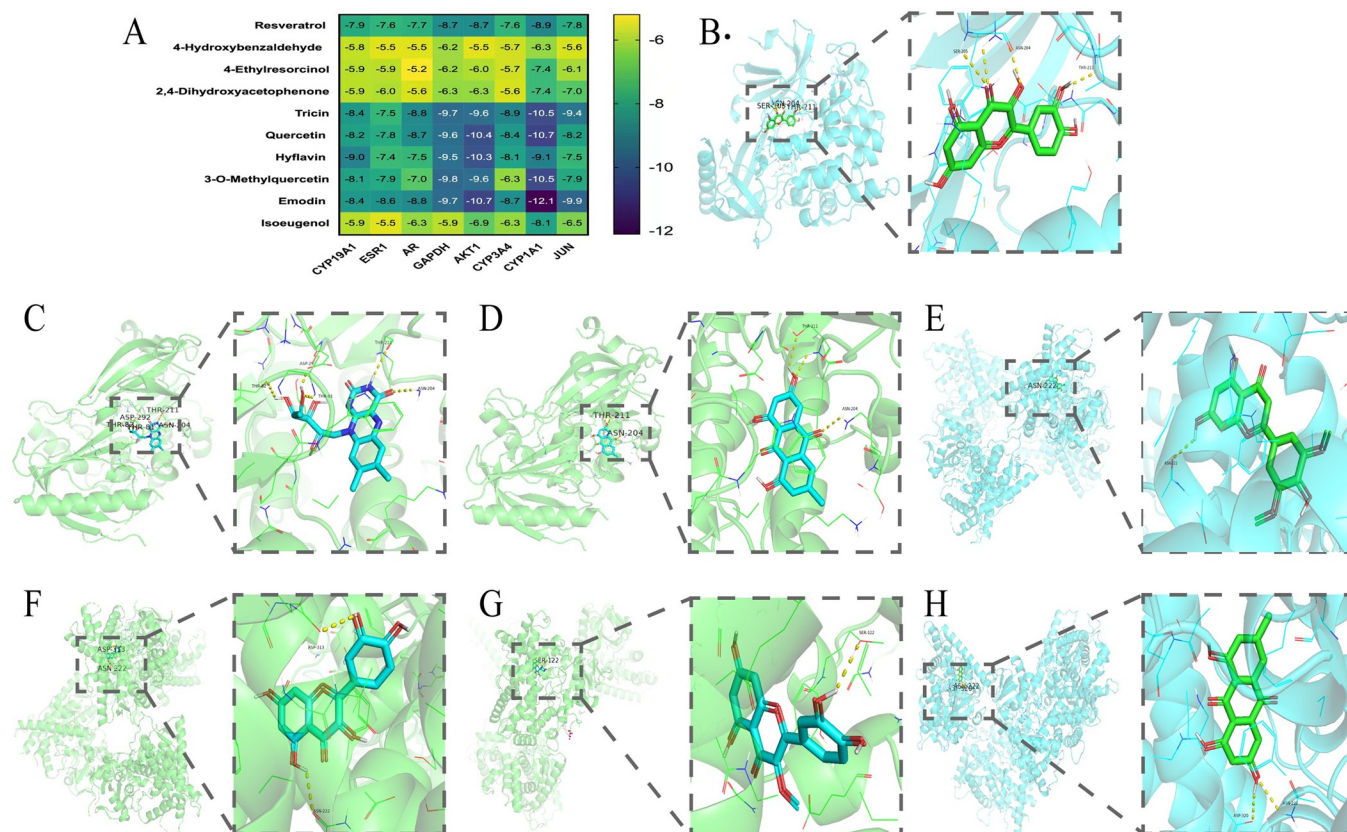

**Fig 4. Molecular docking analysis.** (A) Heatmap of the binding energies. (B) Quercetin-Akt1, (C) Hyflavin-Akt1, (D) emodin-Akt1, (E) tricrin-CYP1A1, (F) quercetin-CYP1A1, (G) 3-O-methylquercetin-CYP1A1, and (H) emodin-CYP1A1.

<https://doi.org/10.1371/journal.pone.0282427.g004>

## Molecular docking results

The key targets (JUN, CYP1A1, CYP19A1, Akt1, CYP3A4, ESR1, AR, and GAPDH) obtained from PPI topological analysis were molecularly docked with the key components (resveratrol, quercetin, emodin, 4-hydroxybenzaldehyde, 4-ethylresorcinol, 2',4'-dihydroxyacetophenone, tricrin, Hyflavin, 3-O-methylquercetin and isoeugenol) in the Component-target network. Molecular docking analysis was performed using AutoDock Vina to obtain docking scores for proteins and components, and the results are represented as heatmaps. (Fig 4A). A lower docking score indicates a greater the affinity between the component and the protein. A docking score of under -5.0 kJ/mol indicates better binding [21]. As shown in Fig 4, Akt1 had high docking affinities with quercetin, Hyflavin, and emodin, with values of -10.4 kcal/mol, -10.3 kcal/mol and -10.7 kcal/mol, respectively. In addition, CYP1A1 had high docking affinities with tricrin, quercetin, 3-O-methylquercetin and emodin, with values of -10.5 kcal/mol, -10.7 kcal/mol, -10.5 kcal/mol and -12.1 kcal/mol, respectively.

## Effects of CZX on the protein expression of key genes related to apoptosis and the PI3K/Akt pathway

To verify the reliability of the key signalling pathways (PI3K/Akt and apoptosis) predicted by network pharmacology, the expression of the proteins PI3K, Akt, Bcl-2, Bax, and caspase-3 in these two pathways was examined by Western blot analysis. As shown in Fig 5, the protein expression levels of PI3K, Akt and Bcl-2 in the skins of the mice from the minoxidil and CZX

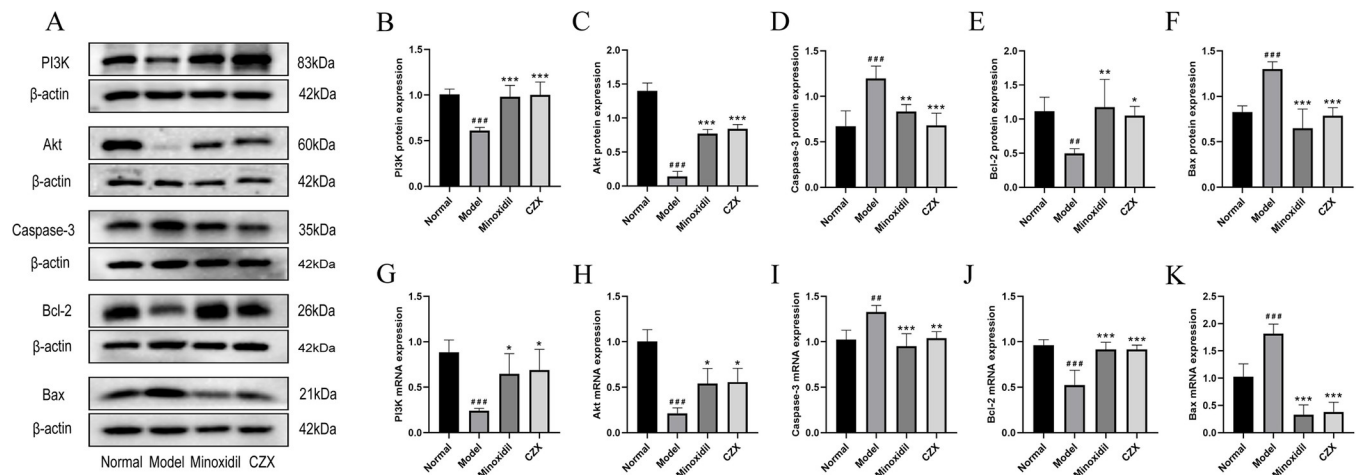

**Fig 5. Effect of CZX on the protein and mRNA transcription levels of key genes related to apoptosis and the PI3K/Akt pathway.** (A) Representative images of protein expression using Western blotting. Quantification of the protein expression levels of (B) PI3K, (C) Akt, (D) caspase-3, (E) Bcl-2 and (F) Bax from the Western blot analysis. mRNA expression levels of (G) PI3K, (H) Akt, (I) caspase-3, (J) Bcl-2 and (K) Bax from quantitative real-time PCR analysis. The results are presented as the mean  $\pm$  SD. Compared with the normal group, \* $P < 0.01$ , \*\*\* $P < 0.001$ ; compared with the model group, \* $P < 0.05$ , \*\* $P < 0.01$ , \*\*\* $P < 0.001$ ;  $n = 5$ .

<https://doi.org/10.1371/journal.pone.0282427.g005>

groups were significantly higher, and the protein expression levels of caspase-3 and Bax were significantly lower, than those in the model group ( $P < 0.05$ ,  $P < 0.01$ ,  $P < 0.001$ ). According to the results, CZX could upregulate the protein levels of PI3K, Akt and Bcl-2 in mouse skin and downregulate the protein levels of caspase-3 and Bax.

### Effects of CZX on the mRNA transcription of key genes related to apoptosis and the PI3K/Akt pathway

Quantitative real-time PCR analysis was used to assess the mRNA expression of PI3K, Akt, Bcl-2, Bax and caspase-3. As shown in Fig 5, compared to the model mice, the mice in the minoxidil and CZX groups showed significantly higher levels of PI3K, Akt and Bcl-2 mRNA and significantly lower levels of caspase-3 and Bax mRNA in their skin ( $P < 0.05$ ,  $P < 0.01$ ,  $P < 0.001$ ). These results indicated that CZX could activate PI3K, Akt and Bcl-2 transcript levels and inhibit caspase-3 and Bax transcript levels, which was consistent with the Western blot analysis.

### Discussion

AGA is a complex problem, and patients seeking medical treatment have limited options. Drug treatments such as minoxidil and finasteride often have side effects that make it difficult for patients to adhere to long-term treatment regimens. Receiving invasive treatments, such as platelet-rich plasma (PRP) injections and hair transplantation, is often difficult, usually need to be repeated and may lead to a costly investment [22–24]. Recently, topical herbal preparations have become more widely available because of their higher rates of compliance, fewer side effects, wider active spectrum and less expensive price [25,26]. As a topical TCM preparation, CZX is expected to be widely used in the complementary and alternative treatment of AGA in the future. For the purpose of verifying CZX's therapeutic effects on AGA, we created an AGA mouse model by subcutaneously injecting testosterone propionate and then treating the mice with CZX. CZX effectively promoted hair growth in AGA model mice, which was verified by skin histological sections.



CZX contains many compounds, which makes it difficult to study its molecular mechanism. As a result, identifying its components is the first step. In accordance with the results of UPLC-Q-TOF/MS analysis, we identified resveratrol, 4-hydroxybenzaldehyde, 4-ethylresorcinol, quercetin, Hyflavin, isoeugenol, emodin and other compounds. Then, we used network pharmacological predictions combined with experimental verification to determine the main active components and molecular mechanisms of CZX for the treatment of AGA.

The network pharmacology results indicated that 10 compounds, including resveratrol, quercetin and emodin, might be the key components in CZX that allow it to exert therapeutic effects against AGA. Resveratrol is a natural polyphenolic compound with a variety of pharmacological and physiological activities, such as being an effective activator of antiaging genes to alleviate ageing-related functional decline in organisms. The activity of resveratrol to promote hair growth is considered a new antiaging effect [27,28]. Kubo C et al. found that resveratrol could promote hair growth by increasing the expression of IGF-1 and KGF in HaCaT cells and reducing the expression of TGF- $\beta$ 1 [29]. Moreover, a study has shown that resveratrol can stimulate hair matrix cell and dermal papilla cell (DPC) proliferation and protect hair follicle cells from environmental damage to promote hair follicle growth [30]. Therefore, resveratrol may promote hair growth through multiple pathways. It was reported that quercetin reduced inflammation-induced perifollicular damage in AGA by attenuating carbon monoxide (CO) production and also exerted anti-androgenic activity by inhibiting 5 $\alpha$ -reductases and downregulating androgen receptors [31,32]. Kim J et al. found that quercetin can enhance cellular energy metabolism and increase secretion of growth factors to spike hair growth by activating the MAPK/CREB signaling pathway [33]. Therefore, quercetin-rich extracts exhibit promising hair growth-promoting activities [34]. Emodin has also been proven to slow down AGA's progression, which may be due to its ability to inhibit 5 $\alpha$ -reductase activity, reduce DHT levels in DPCs, and decrease the expression of two upregulated genes (TGF- $\beta$ 1, DKK-1) in AGA [35]. Because of the combination of these active compounds, CZX may have a better therapeutic effect on AGA.

The KEGG pathway enrichment results showed that CZX may play a therapeutic role in the treatment of AGA by regulating steroid hormone biosynthesis, apoptosis, the PI3K-Akt and HIF-1 signalling pathways, etc. One of the representative causes of hair loss is the failure to control apoptosis during catagen, leading to the continuous induction of apoptosis [36]. The most well-known apoptotic pathway is the intrinsic pathway mediated by mitochondria, which begins with Bax translocation to the mitochondrial membrane, which triggers the release of cytochrome c and prevents the release of Bcl-2. The released cytochrome c combines with procaspase 9 and other complexes to form apoptosomes. These apoptosomes then activate the caspase-3 signalling cascade, thereby inducing cell destruction [37]. Studies have shown that the PI3K/Akt pathway may play a key role in apoptosis. Activating PI3K/Akt can suppress apoptosis to treat related diseases [38–40]. Hair follicle regeneration is also impacted by the PI3K/Akt signalling pathway. Previous studies have found that when specific inhibitors are used to inhibit the PI3K/Akt pathway, hair follicle regeneration mediated by cultured epidermal stem cells (Epi-SCs) and skin-derived precursors (SKPs) is also significantly inhibited [41]. Therefore, activating the PI3K/Akt pathway to inhibit hair follicle cell apoptosis is a possible therapeutic strategy for AGA. In our study, CZX had a beneficial effect on hair growth by upregulating PI3K, Akt and Bcl-2 and downregulating Bax and caspase-3. Moreover, the results of this study are consistent with those obtained in previous studies. This suggests that CZX may promote hair growth by regulating the PI3K/Akt and apoptosis pathways.

In this study, UPLC-Q-TOF/MS was used to qualitatively analyse CZX, and the database provided by the instrument was then used to speculate the chemical composition of CZX. However, no chemical reference was used for comparison, and no atlas of the medicinal

materials contained in CZX was tested. Therefore, we hope to detect the chemical composition of CZX through more accurate experiments. CZX is a complex TCM prescription that may play a role in treating AGA through multiple active components acting on multiple targets at the same time. This study verified only the PI3K/Akt and apoptosis pathways, and cannot fully represent the mechanism of CZX in the treatment of AGA. Therefore, further in-depth and comprehensive experiments are needed.

## Conclusion

In this study, we used UPLC–Q–TOF/MS to analyse the chemical components of CZX and combined it with network pharmacology to analyse the main components and mechanisms responsible for the effect of CZX on AGA. The findings reveal that CZX plays its therapeutic role mainly by regulating apoptosis and the PI3K/AKT pathway, which offers new approaches for treating and preventing AGA.

## Supporting information

**S1 Raw images. Boxes indicated parts used in the figure.**  
(PDF)

**S1 Graphical abstract.**  
(DOCX)

## Author Contributions

**Conceptualization:** Yi Cao, Maocan Tao.

**Data curation:** Tingting Fang, Ruofei Xu, Yineng He.

**Formal analysis:** Tingting Fang, Ruofei Xu, Yi Yan, Hongbin Luo.

**Investigation:** Hongyang Fu.

**Methodology:** Tingting Fang, Yineng He, Yi Yan, Yi Cao, Maocan Tao.

**Software:** Shaopeng Sun.

**Supervision:** Maocan Tao.

**Validation:** Shaopeng Sun, Hongyang Fu.

**Visualization:** Shaopeng Sun.

**Writing – original draft:** Tingting Fang, Ruofei Xu.

**Writing – review & editing:** Hongbin Luo, Maocan Tao.

## References

1. Katzer T, Leite JA, Beck R, Da SC. Physiopathology and current treatments of androgenetic alopecia: going beyond androgens and anti-androgens. *Dermatol Ther.* 2019; 32(5):e13059. <https://doi.org/10.1111/dth.13059> PMID: 31400254
2. Bruce AJ, Pincelli TP, Heckman MG, Desmond CM, Arthurs JR, Diehl NN, et al. A randomized, controlled pilot trial comparing platelet-rich plasma to topical minoxidil foam for treatment of androgenic alopecia in women. *Dermatol Surg.* 2020; 46(6):826–32. <https://doi.org/10.1097/DSS.0000000000002168> PMID: 31574029
3. He F, Shen M, Zhao Z, Liu Y, Zhang S, Tang Y, et al. Epidemiology and disease burden of androgenetic alopecia in college freshmen in China: a population-based study. *Plos One.* 2022; 17(2):e263912. <https://doi.org/10.1371/journal.pone.0263912> PMID: 35171966



4. Jain R, De-Eknamkul W. Potential targets in the discovery of new hair growth promoters for androgenic alopecia. *Expert Opin Ther Targets*. 2014; 18(7):787–806. <https://doi.org/10.1517/14728222.2014.922956> PMID: 24873677
5. Sánchez-Díaz M, López-Delgado D, Montero-Vílchez T, Salvador-Rodríguez L, Molina-Leyva A, Tercedor-Sánchez J, et al. Systemic minoxidil accidental exposure in a paediatric population: a case series study of cutaneous and systemic side effects. *J Clin Med*. 2021; 10(18). <http://doi.org/10.3390/jcm10184257>.
6. Kaplan-Marans E, Sandozi A, Martinez M, Lee J, Schulman A, Khurgin J. Medications most commonly associated with erectile dysfunction: evaluation of the Food and Drug Administration national pharmacovigilance database. *Sex Med*. 2022; 10(5):100543. <https://doi.org/10.1016/j.esxm.2022.100543> PMID: 35843193
7. Subedi L, Pandey P, Shim JH, Kim KT, Cho SS, Koo KT, et al. Preparation of topical bimatoprost with enhanced skin infiltration and in vivo hair regrowth efficacy in androgenic alopecia. *Drug Deliv*. 2022; 29(1):328–41. <http://doi.org/10.1080/10717544.2022.2027046>.
8. Zgonc ŠA, Poljšak N, Kočevár GN, Kreft S. Herbal preparations for the treatment of hair loss. *Arch Dermatol Res*. 2020; 312(6):395–406. <https://doi.org/10.1007/s00403-019-02003-x> PMID: 31680216
9. You Q, Li L, Ma X, Gao T, Xiong S, Yan Y, et al. Meta-analysis on the efficacy and safety of traditional Chinese medicine as adjuvant therapy for refractory androgenetic alopecia. *Evid Based Complement Alternat Med*. 2019; 2019:9274148. <https://doi.org/10.1155/2019/9274148> PMID: 31781285
10. Leem J, Jung W, Park HJ, Kim K. A network pharmacology-based approach to explore mechanism of action of medicinal herbs for alopecia treatment. *Sci Rep*. 2022; 12(1):2852. <https://doi.org/10.1038/s41598-022-06811-6> PMID: 35181715
11. Li Y, Han M, Lin P, He Y, Yu J, Zhao R. Hair growth promotion activity and its mechanism of Polygonum multiflorum. *Evid Based Complement Alternat Med*. 2015; 2015:517901. <https://doi.org/10.1155/2015/517901> PMID: 26294926
12. Kim MH, Choi YY, Cho IH, Hong J, Kim SH, Yang WM. Angelica sinensis induces hair regrowth via the inhibition of apoptosis signaling. *Am J Chin Med*. 2014; 42(4):1021–34. <https://doi.org/10.1142/S0192415X14500645> PMID: 25004889
13. Zhang Y, Chen S, Qu F, Su G, Zhao Y. In vivo and in vitro evaluation of hair growth potential of Cacumen Platycladi, and GC-MS analysis of the active constituents of volatile oil. *J Ethnopharmacol*. 2019; 238:111835. <https://doi.org/10.1016/j.jep.2019.111835> PMID: 30917929
14. Kim MH, Kim SH, Yang WM. Beneficial effects of Astragaloside IV for hair loss via inhibition of Fas/Fas L-mediated apoptotic signaling. *Plos One*. 2014; 9(3):e92984. <https://doi.org/10.1371/journal.pone.0092984> PMID: 24676213
15. Fan X, Chen J, Zhang Y, Wang S, Zhong W, Yuan H, et al. Alpinetin promotes hair regeneration via activating hair follicle stem cells. *Chin Med*. 2022; 17(1):63. <https://doi.org/10.1186/s13020-022-00619-2> PMID: 35637486
16. Lao Z, Fan Y, Huo Y, Liao F, Zhang R, Zhang B, et al. Physcion, a novel inhibitor of 5 $\alpha$ -reductase that promotes hair growth in vitro and in vivo. *Arch Dermatol Res*. 2022; 314(1):41–51. <http://doi.org/10.1007/s00403-021-02195-1>.
17. Zhang H, Zhou C, Zhang Z, Yao S, Bian Y, Fu F, et al. Integration of network pharmacology and experimental validation to explore the pharmacological mechanisms of Zhuanggu Busui formula against osteoporosis. *Front Endocrinol (Lausanne)*. 2021; 12:841668. <https://doi.org/10.3389/fendo.2021.841668> PMID: 35154014
18. Chen Y, Wang YF, Song SS, Zhu J, Wu LL, Li XY. Potential shared therapeutic and hepatotoxic mechanisms of Tripterygium wilfordii polyglycosides treating three kinds of autoimmune skin diseases by regulating IL-17 signaling pathway and Th17 cell differentiation. *J Ethnopharmacol*. 2022; 296:115496. <http://doi.org/10.1016/j.jep.2022.115496>.
19. Tan X, He Y, Ou Y, Xiong X, Deng Y. Exploring the mechanisms and molecular targets of Taohong Siwu decoction for the treatment of androgenetic alopecia based on network analysis and molecular docking. *Clin Cosmet Investig Dermatol*. 2022; 15:1225–36. <https://doi.org/10.2147/CCID.S361820> PMID: 35800455
20. Kim MH, Park SJ, Yang WM. Network pharmacology study and experimental confirmation revealing the ameliorative effects of Decursin on chemotherapy-induced alopecia. *Pharmaceuticals (Basel)*. 2021; 14(11). <https://doi.org/10.3390/ph14111150> PMID: 34832932
21. Liu S, Zhao F, Deng Y, Zeng Y, Yan B, Guo J, et al. Investigating the multi-target therapeutic mechanism of Guihuang formula on chronic prostatitis. *J Ethnopharmacol*. 2022; 294:115386. <https://doi.org/10.1016/j.jep.2022.115386> PMID: 35580771
22. Saad S, Cavelier-Balloy B, Smadja J, Assouly P, Reygagne P. Inflammatory complications after hair transplantation: report of 10 cases. *J Cosmet Dermatol*. 2022. <https://doi.org/10.1111/jocd.15244> PMID: 35841210

23. Almohanna HM, Perper M, Tosti A. Safety concerns when using novel medications to treat alopecia. *Expert Opin Drug Saf*. 2018; 17(11):1115–28. <https://doi.org/10.1080/14740338.2018.1533549> PMID: 30318935
24. Farris PK, Rogers N, McMichael A, Kogan S. A novel multi-targeting approach to treating hair loss, using standardized nutraceuticals. *J Drugs Dermatol*. 2017; 16(11):s141–8. PMID: 29141069
25. Dou J, Zhang Z, Xu X, Zhang X. Exploring the effects of Chinese herbal ingredients on the signaling pathway of alopecia and the screening of effective Chinese herbal compounds. *J Ethnopharmacol*. 2022; 294:115320. <https://doi.org/10.1016/j.jep.2022.115320> PMID: 35483562
26. Fan X, Chen J, Zhang Y, Wang S, Zhong W, Yuan H, et al. Alpinetin promotes hair regeneration via activating hair follicle stem cells. *Chin Med*. 2022; 17(1):63. <https://doi.org/10.1186/s13020-022-00619-2> PMID: 35637486
27. Bai X, Yao L, Ma X, Xu X. Small molecules as SIRT modulators. *Mini Rev Med Chem*. 2018; 18(13):1151–7. <https://doi.org/10.2174/1389557516666160620095103> PMID: 27334466
28. Villalba JM, Alcaín FJ. Sirtuin activators and inhibitors. *Biofactors*. 2012; 38(5):349–59. <https://doi.org/10.1002/biof.1032> PMID: 22730114
29. Kubo C, Ogawa M, Uehara N, Katakura Y. Fisetin Promotes Hair growth by augmenting TERT expression. *Front Cell Dev Biol*. 2020; 8:566617. <https://doi.org/10.3389/fcell.2020.566617> PMID: 33178686
30. Zhang Y, Ni C, Huang Y, Tang Y, Yang K, Shi X, et al. Hair growth-promoting effect of resveratrol in mice, human hair follicles and dermal papilla cells. *Clin Cosmet Investig Dermatol*. 2021; 14:1805–14. <https://doi.org/10.2147/CCID.S335963> PMID: 34866922
31. Ruksiriwanich W, Khantham C, Muangsanguan A, Chittasupho C, Rachtanapun P, Jantanasakulwong K, et al. Phytochemical constitution, anti-Inflammation, anti-Androgen, and hair growth-promoting potential of shallot (*Allium ascalonicum* L.) extract. *Plants (Basel)*. 2022; 11(11). <https://doi.org/10.3390/plants11111499> PMID: 35684272
32. Ruksiriwanich W, Khantham C, Linsaenkart P, Chaitep T, Jantrawut P, Chittasupho C, et al. In vitro and in vivo regulation of SRD5A mRNA expression of supercritical carbon dioxide extract from *Asparagus racemosus* Willd. root as anti-sebum and pore-minimizing active ingredients. *Molecules*. 2022; 27(5). <https://doi.org/10.3390/molecules27051535> PMID: 35268636
33. Kim J, Kim SR, Choi YH, Shin JY, Kim CD, Kang NG, et al. Quercitrin stimulates hair growth with enhanced expression of growth factors via activation of MAPK/CREB signaling pathway. *Molecules*. 2020; 25(17). <https://doi.org/10.3390/molecules25174004> PMID: 32887384
34. Rondanelli M, Perna S, Peroni G, Guido D. A bibliometric study of scientific literature in Scopus on botanicals for treatment of androgenetic alopecia. *J Cosmet Dermatol*. 2016; 15(2):120–30. <https://doi.org/10.1111/jocd.12198> PMID: 26608588
35. Tan J, Pan J, Sun L, Zhang J, Wu C, Kang L. Bioactives in Chinese proprietary medicine modulates 5 $\alpha$ -Reductase activity and gene expression associated with androgenetic alopecia. *Front Pharmacol*. 2017; 8:194. <http://doi.org/10.3389/fphar.2017.00194>.
36. Chen L, Duan H, Xie F, Gao Z, Wu X, Chen F, et al. Tetrahydroxystilbene glucoside effectively prevents apoptosis induced hair loss. *Biomed Res Int*. 2018; 2018:1380146. <https://doi.org/10.1155/2018/1380146> PMID: 29808162
37. Jang WY, Kim DS, Park SH, Yoon JH, Shin CY, Huang L, et al. Connarus semidecandrus Jack exerts anti-alopecia effects by targeting 5 $\alpha$ -Reductase activity and an intrinsic apoptotic pathway. *Molecules*. 2022; 27(13). <http://doi.org/10.3390/molecules27134086>.
38. Li J, Wu J, Huang J, Cheng Y, Wang D, Liu Z. Uncovering the effect and mechanism of Rhizoma Corydalis on myocardial infarction through an integrated network pharmacology approach and experimental verification. *Front Pharmacol*. 2022; 13:927488. <https://doi.org/10.3389/fphar.2022.927488> PMID: 35935870
39. Yang L, Zhu J, Yang L, Gan Y, Hu D, Zhao J, et al. SCO-spondin-derived peptide NX210 rescues neurons from cerebral ischemia/reperfusion injury through modulating the Integrin- $\beta$ 1 mediated PI3K/Akt pathway. *Int Immunopharmacol*. 2022; 111:109079. <http://doi.org/10.1016/j.intimp.2022.109079>.
40. Chen Y, Fan Z, Wang X, Mo M, Zeng SB, Xu RH, et al. PI3K/Akt signaling pathway is essential for de novo hair follicle regeneration. *Stem Cell Res Ther*. 2020; 11(1):144. <https://doi.org/10.1186/s13287-020-01650-6> PMID: 32245516
41. Zhang X, Zhou D, Ma T, Liu Q. Vascular endothelial growth factor protects CD200-rich and CD34-positive hair follicle stem cells against androgen-induced apoptosis through the phosphoinositide 3-kinase/Akt pathway in patients with androgenic alopecia. *Dermatol Surg*. 2020; 46(3):358–68. <https://doi.org/10.1097/DSS.0000000000002091> PMID: 31478937
